# Supplementary material for: Note of First Records of Isognomon from Easter Island
Source: Springer Nature journal article supplement (doi:10.1186/s12885-021-08832-2), 1996-04-01
Supplement: MOESM3 [file 19768390]

**Worksheet 3: PROCEM**

SUBJECT BIRTHDATE (YYMMDD): \_ \_ \_ \_ \_

SUBJECT ID: \_ \_ \_ \_ \_

SUBJECT INITIALS: \_ \_

DATE OF MDT CONFERENCE (YYMMDD): \_ \_ \_ \_ \_

**PROCEM: MDT CONFERENCE AT BASELINE**

**RIGHT BREAST**

|                                                                                   |                                                                                                                                                                                                                                      |
|-----------------------------------------------------------------------------------|--------------------------------------------------------------------------------------------------------------------------------------------------------------------------------------------------------------------------------------|
| <b>Recommendation due to imaging extent from mammography/tomosynthesis and US</b> | <input type="checkbox"/> Mastectomy<br><input type="checkbox"/> Partial Mastectomy +/- displacement OPS<br><input type="checkbox"/> Replacement OPS<br><input type="checkbox"/> Reduction mammoplasty<br><input type="checkbox"/> NA |
| <b>Surgery in axilla</b>                                                          | <input type="checkbox"/> Sentinel node biopsy<br><input type="checkbox"/> Axillary clearance                                                                                                                                         |

**LEFT BREAST**

|                                                                                   |                                                                                                                                                                                                                                      |
|-----------------------------------------------------------------------------------|--------------------------------------------------------------------------------------------------------------------------------------------------------------------------------------------------------------------------------------|
| <b>Recommendation due to imaging extent from mammography/tomosynthesis and US</b> | <input type="checkbox"/> Mastectomy<br><input type="checkbox"/> Partial Mastectomy +/- displacement OPS<br><input type="checkbox"/> Replacement OPS<br><input type="checkbox"/> Reduction mammoplasty<br><input type="checkbox"/> NA |
| <b>Surgery in axilla</b>                                                          | <input type="checkbox"/> Sentinel node biopsy<br><input type="checkbox"/> Axillary clearance                                                                                                                                         |

SIGNATURE RESPONSIBLE SURGEON: \_\_\_\_\_
