# Supplementary material for: Note of First Records of Isognomon from Easter Island
Source: Springer Nature journal article supplement (doi:10.1186/s12885-021-08832-2), 1996-04-01
Supplement: MOESM4 [file 19768390]

**Worksheet 4: PROCEM**

SUBJECT BIRTHDATE (YYMMDD): \_ \_ \_ \_ \_ SUBJECT ID: \_ \_ \_ \_ \_

SUBJECT INITIALS: \_ \_ DATE OF MG (YYMMDD): \_ \_ \_ \_ \_

**PROCEM: VOLUME**

**RIGHT BREAST**

|                     |    |
|---------------------|----|
| <b>Width*</b>       | cm |
| <b>Height*</b>      | cm |
| <b>Compression*</b> | cm |

\*=Measurements from CC projection. Breast volume will be calculated automatically at data entry in REDCap

**LEFT BREAST**

|                     |    |
|---------------------|----|
| <b>Width*</b>       | cm |
| <b>Height*</b>      | cm |
| <b>Compression*</b> | cm |

\*=Measurements from CC projection. Breast volume will be calculated automatically at data entry in REDCap

SIGNATURE RESPONSIBLE RADIOLOGIST: \_\_\_\_\_
