# Supplementary material for: Note of First Records of Isognomon from Easter Island
Source: Springer Nature journal article supplement (doi:10.1186/s12885-021-08832-2), 1996-04-01
Supplement: MOESM8 [file 19768390]

**Worksheet 8: PROCEM**

SUBJECT BIRTHDATE (YYMMDD): \_ \_ \_ \_ \_

SUBJECT ID: \_ \_ \_ \_ \_

SUBJECT INITIALS: \_ \_

**PROCEM: RECOMMENDATION AFTER CEM**

|                          |                                                             |
|--------------------------|-------------------------------------------------------------|
| <b>Change of therapy</b> | <input type="checkbox"/> Yes<br><input type="checkbox"/> No |
|--------------------------|-------------------------------------------------------------|

**If yes above:**

|                                                                |                                                                                                                                                       |
|----------------------------------------------------------------|-------------------------------------------------------------------------------------------------------------------------------------------------------|
| <b>Change from partial mastectomy (PME) to mastectomy (ME)</b> | <input type="checkbox"/> Yes, due to larger unifocal extent<br><input type="checkbox"/> Yes, due to multifocal disease<br><input type="checkbox"/> No |
| <b>Change from PME +/- displacement to PME + replacement</b>   | <input type="checkbox"/> Yes, due to larger unifocal extent<br><input type="checkbox"/> Yes, due to multifocal disease<br><input type="checkbox"/> No |
| <b>Change from mastectomy (ME) to partial mastectomy (PME)</b> | <input type="checkbox"/> Yes<br><input type="checkbox"/> No                                                                                           |
| <b>Change from PME + replacement to PME +/- displacement</b>   | <input type="checkbox"/> Yes<br><input type="checkbox"/> No                                                                                           |
| <b>New findings of contralateral malignancy</b>                | <input type="checkbox"/> Yes<br><input type="checkbox"/> No                                                                                           |
| <b>Neoadjuvant chemotherapy instead of primary surgery</b>     | <input type="checkbox"/> Yes<br><input type="checkbox"/> No                                                                                           |
| <b>Axillary clearance instead of sentinel node biopsy</b>      | <input type="checkbox"/> Yes<br><input type="checkbox"/> No                                                                                           |

SIGNATURE RESPONSIBLE SURGEON: \_\_\_\_\_
