# Supplementary material for: The PROCEM study protocol: Added value of preoperative contrast-enhanced mammography in staging of malignant breast lesions - a prospective randomized multicenter study
Source: BMC Cancer. 2021 Oct 18;21:1115. doi: 10.1186/s12885-021-08832-2 (PMC8521511; doi:10.1186/s12885-021-08832-2)
Supplement: Supplementary file 9 — Additional file 9. [file 12885_2021_8832_MOESM9_ESM.pdf]

## Worksheet 9: PROCEM

**SUBJECT BIRTHDATE (YYMMDD):** \_ \_ \_ \_ \_

**SUBJECT ID:** \_ \_ \_ \_ \_

**SUBJECT INITIALS:**

DATE OF CEM (YYMMDD): \_\_\_\_-\_\_\_\_-\_\_\_\_

## PROCEN: ADVERSE EVENTS OF CEM

|                                        |                                                             |
|----------------------------------------|-------------------------------------------------------------|
| Any adverse event due to CEM procedure | <input type="checkbox"/> Yes<br><input type="checkbox"/> No |
|----------------------------------------|-------------------------------------------------------------|

**If yes above:**

|                                                        |                                                                        |
|--------------------------------------------------------|------------------------------------------------------------------------|
| <p><b>Any allergic reaction to iodine contrast</b></p> | <p><input type="checkbox"/> Yes</p> <p><input type="checkbox"/> No</p> |
| <p><b>Any other adverse events</b></p>                 | <p><input type="checkbox"/> Yes</p> <p><input type="checkbox"/> No</p> |

**If any other adverse events, please specify:**

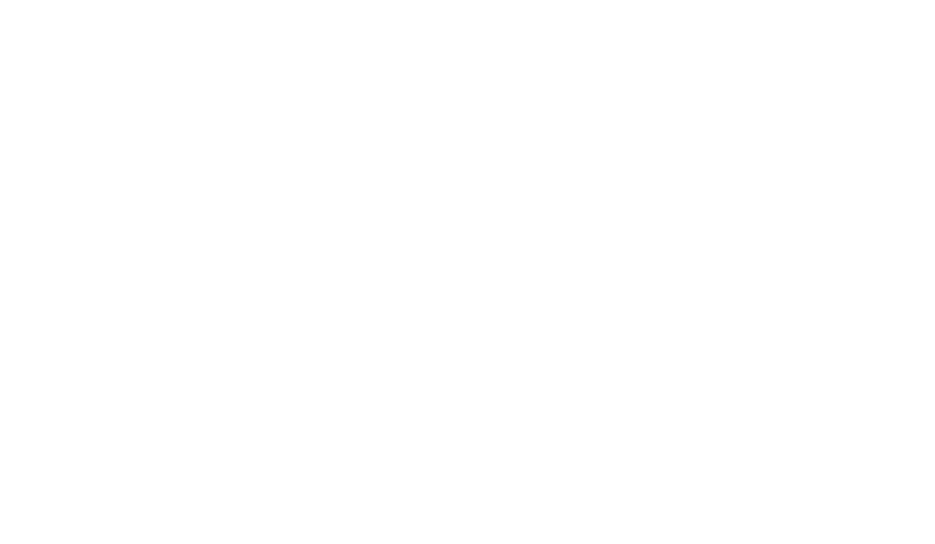

**SIGNATURE RESPONSIBLE NURSE:** \_\_\_\_\_
